# Supplementary material for: On the ligand–core interaction in ligand-protected gold superatoms. Insights from Au25(XR)18 (X = S, Se, Te) via relativistic DFT calculations
Source: Royal Society of Chemistry journal article supplement (doi:10.1039/c9cp02077b), 2019-01-01
Supplement: c9cp02077b1.pdf [file c9cp02077b1.pdf]

# **On the Ligand-Core Interaction in Ligand-Protected Gold Superatoms. Insights from $\text{Au}_{25}(\text{XR})_{18}$ (X= S, Se, Te) via Relativistic DFT Calculations**

Alvaro Muñoz-Castro<sup>a</sup>,

<sup>a</sup>*Grupo de Química Inorgánica y Materiales Moleculares, Universidad Autónoma de Chile, El Llano Subercaseaux 2801, Santiago, Chile.*

**Table S1.** Selected geometrical parameters for  $[\text{Au}_{25}(\text{XMe})_{18}]^-$  (X=S, Se and Te) for calculations involving scalar relativistic (SR) and scalar+spin-orbit corrections (SO). Values in Å. In addition, CShM values and Hirshfeld charge analysis (a.u.) are given.

|                                      | S     | S     | Se    | Se    | Te    | Te    |
|--------------------------------------|-------|-------|-------|-------|-------|-------|
|                                      | SR    | SO    | SR    | SO    | SR    | SO    |
| CShM                                 | 0.12  | 0.11  | 0.10  | 0.10  | 0.09  | 0.10  |
|                                      |       |       |       |       |       |       |
| Au-X                                 | 2.45  | 2.46  | 2.56  | 2.53  | 2.67  | 2.63  |
| Au <sub>13</sub> -Au                 | 3.39  | 3.38  | 3.39  | 3.34  | 3.56  | 3.56  |
|                                      |       |       |       |       |       |       |
| <sup>a</sup> ∅ Au <sub>13</sub>      | 2.85  | 2.85  | 2.83  | 2.85  | 2.82  | 2.80  |
| ∅ Au <sub>12</sub>                   | 5.08  | 5.08  | 5.16  | 5.13  | 5.36  | 5.33  |
| ∅ (SMe) <sub>12</sub>                | 5.15  | 5.15  | 5.30  | 5.29  | 5.46  | 5.42  |
| ∅ (SMe) <sub>6</sub>                 | 6.26  | 6.26  | 6.40  | 6.35  | 6.79  | 6.80  |
|                                      |       |       |       |       |       |       |
| Hirshfeld                            |       |       |       |       |       |       |
| Au <sub>13</sub>                     | +2.65 | +2.62 | +2.54 | +2.50 | +1.95 | +1.99 |
| Au <sub>12</sub> (SMe) <sub>18</sub> | -3.65 | -3.62 | -3.54 | -3.50 | -3.95 | -3.99 |

<sup>a</sup>Diameter.
